# Supplementary material
Source: Springer Nature journal article supplement (https://www.springermedizin.de/resource/supplementary/12891_2012_1598_MOESM4_ESM.pdf/9508976)

**Total proteolytic activity  
(RLU/mg tissue)**

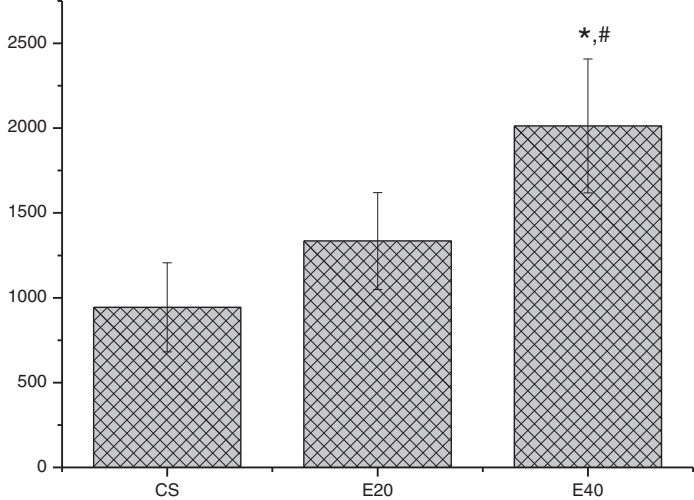

Supplement: MOESM4 [file 9508976]
